# Supplementary material for: New insights of the influence of ocean circulation on the sedimentary distribution in the Southwestern Atlantic margin (23° S to 55° S) based on Nd and Pb isotopic fingerprinting
Source: Copernicus journal article supplement (doi:10.5194/os-2021-44), 2021-06-01
Supplement: Supplementary file 1 [file SupplMat.xlsx]

## Sheet: Plan1
Sector	Sample	Latitude(o)	Longitude (o)	Depth (m)	143Nd/144Nd	±s . 106	eNd	206Pb/204Pb	±s . 103	207Pb/204Pb	±s . 103	208Pb/204Pb	±s . 103	Source
Argentina					0.51253	66.5957	-2.11083	18.62	103.726	15.615	15.9844	38.5198	149.46
	VM-15-113	-54.17	-64.97	101	0.512506	7	-2.6							Basile et al., 1997
	VM-18-59	-48.15	-64.38	104	0.512434	7	-4							Basile et al., 1997
	1518	-46.14	-66.4	103	0.512588	8	-1	18.541	3	15.603	3	38.382	3	de Mahiques et al., 2008
	1509	-46.14	-65.03	96	0.512544	14	-1.8							de Mahiques et al., 2008
	1451	-44.74	-65.42	78	0.512621	10	-0.3	18.665	5	15.608	5	38.546	4	de Mahiques et al., 2008
	VM-12-33	-44.1	-63.92	77	0.512466	6	-3.4							Basile et al., 1997
	1126	-41.2	-58.43	84	0.512517	9	-2.4	18.711	9	15.612	9	38.579	9	de Mahiques et al., 2008
	VM-14-25	-40.43	-61.23	35	0.512542	10	-1.9							Basile et al., 1997
	1045	-39.84	-61.96	17	0.512631	11	-0.1	18.703	35	15.643	35	38.726	36	de Mahiques et al., 2008
	6308-3	-39.3	-53.97	3620	0.512421	12	-4.23							Lantzsch et al., 2014
	VM-15-152	-38.43	-56.7	68	0.512555	8	-1.6							Basile et al., 1997
	575	-37.37	-53.8	1097	0.512536	10	-2	18.48	6	15.609	6	38.366	7	de Mahiques et al., 2008
Río de la Plata					0.512147	37.8517	-9.6	18.6667	58.1062	15.6453	9.71253	38.7	77.8267
	VM-12-23	-35.67	-56.97	7	0.512153	4	-9.5							Basile et al., 1997
	SB26	-35.54	-56.81	8	0.512218	8	-8.2							de Mahiques et al., 2008
	192	-35.22	-56.89	6	0.512123	9	-10.1							de Mahiques et al., 2008
	208	-35.13	-54.67	26	0.512175	13	-9							de Mahiques et al., 2008
	221	-35.02	-55.7	11	0.512163	10	-9.3							de Mahiques et al., 2008
	P	-34.97	-56.15	9	0.512129	10	-9.9	18.651	9	15.643	1	38.676	10	de Mahiques et al., 2008
	K	-34.94	-56.21	6	0.512132	10	-9.9	18.618	5	15.637	5	38.637	5	de Mahiques et al., 2008
	197	-34.93	-56.73	6	0.512111	8	-10.3							de Mahiques et al., 2008
	T	-34.93	-56.33	7	0.512124	8	-10	18.731	8	15.656	8	38.787	8	de Mahiques et al., 2008
	108	-34.83	-57.58	7	0.512205	12	-8.5							de Mahiques et al., 2008
	163	-34.7	-57.03	5	0.51209	9	-10.7							de Mahiques et al., 2008
	64	-34.69	-57.95	8	0.512138	11	-9.8							de Mahiques et al., 2008
Punta del Este Basin					0.512463	6.36099	-3.41811	18.6504	224.941	15.6106	20.4846	38.5933	249.222
	35	-37.2	-51.5985	4066	0.51242	7	-4.26	18.795	5	15.623	5	38.756	12	This work
	37	-36.8	-51.9901	3579	0.512365	6	-5.33	18.794	10	15.616	9	38.77	21	This work
	40	-36.2	-52.6006	2378	0.51239	6	-4.84	18.773	6	15.627	5	38.742	12	This work
	55	-36.148	-53.128	588	0.512549	6.47116	-1.7339							Franco-Fraguas et al., 2016
	41	-36	-52.8002	1257	0.512485	5	-2.99	18.756	6	15.61	5	38.692	13	This work
	42	-35.8	-53	152	0.512534	5	-2.03	18.675	8	15.619	8	38.618	21	This work
	37	-35.733	-52.749	876	0.512519	7.35326	-2.32717							Franco-Fraguas et al., 2016
	13835-2	-35.72	-53.09	131	0.512609	3	-0.56							Lantzsch et al., 2014
	43	-35.6	-53.1901	93	0.51254	7	-1.92	18.591	8	15.613	8	38.506	25	This work
	44	-35.4	-53.4006	59	0.512218	8	-8.19	18.169	26	15.566	23	38.069	54	This work
	26	-35.363	-52.483	727	0.512529	8.27279	-2.13581							Franco-Fraguas et al., 2016
	15	-35.241	-52.389	608	0.512507	6.71519	-2.56194							Franco-Fraguas et al., 2016
	7	-35.036	-52.233	473	0.512529	7.34172	-2.11961							Franco-Fraguas et al., 2016
	48	-35	-53.19	47	0.512402	5	-4.61	18.0446	7	15.5575	7	37.9861	22	This work
	2	-34.959	-52.1	762	0.512539	7.46624	-1.93266							Franco-Fraguas et al., 2016
	5	-34.833	-52.048	643	0.512521	6.00625	-2.28701							Franco-Fraguas et al., 2016
	47	-34.79	-53.3998	49	0.512273	6	-7.12	18.543	8	15.633	7	38.427	20	This work
	3	-34.779	-51.944	861	0.512512	6.87128	-2.45213							Franco-Fraguas et al., 2016
Pelotas Basin					0.51214	6.41176	-10.3983	18.7925	5.8331	15.6506	5.27949	38.8607	12.8135
	557	-33.7863	-52.2126	60	0.512091	5	-10.67	18.8639	10.0753	15.6553	8.68304	38.901	21.0894	This work
	556	-33.751	-52.3045	67	0.512044	5	-11.58	19.0314	5.70997	15.6663	4.8384	39.1397	12.1004	This work
	6834	-33.58	-50.69	500	0.512185	14	−8.8							de Mahiques et al., 2008
	562	-33.4474	-50.8634	142	0.5121	4	-10.5	18.9988	5.48068	15.6673	4.2343	39.1203	11.0385	This work
	561	-33.2724	-51.301	80	0.512217	4	-8.21	18.8514	5.1845	15.6445	4.51293	38.8394	12.167	This work
	560	-33.2328	-51.4099	62	0.512282	4	-6.95	18.644	4.92513	15.6295	5.78903	38.5413	18.3496	This work
	6836	-33.18	-50.85	100	0.512084	13	−10.8							de Mahiques et al., 2008
	6837	-33.18	-50.85	500	0.512252	11	−7.5	18.451	11	15.62	11	38.405	22	de Mahiques et al., 2008
	568	-33.0959	-50.4472	337	0.51208	5	-10.89	18.8885	4.64767	15.6655	4.26771	39.0547	9.70261	This work
	566	-32.9977	-50.6148	95	0.512056	5	-11.35	18.9465	3.88509	15.6723	3.99628	39.0965	13.1519	This work
	565	-32.8311	-50.9177	71	0.512049	6	-11.49	19.04	4.41988	15.6783	3.57889	39.2027	9.46528	This work
	571	-32.5271	-50.2987	328	0.512038	3	-11.7	18.944	5	15.672	4	39.064	11	This work
	570	-32.4719	-50.3662	138	0.51208	5	-10.89	19.0486	6.48149	15.6691	5.57444	39.1384	16.1801	This work
	6844	-32.35	-50.45	500	0.512163	13	−9.3							de Mahiques et al., 2008
	6847	-32.32	-50.18	500	0.512178	9	−9.0							de Mahiques et al., 2008
	6211-2	-32.31	-50.24	657	0.512175	8	-9.02							Lantzsch et al., 2014
	569	-32.2869	-50.5579	89	0.512088	5	-10.74	19.0056	3.64803	15.6723	3.22648	39.0994	8.69592	This work
	6846	-32.21	-50.45	100	0.512174	13	−9.1	18.685	11	15.634	11	38.684	12	de Mahiques et al., 2008
	564	-32.1917	-51.9481	19	0.512047	4	-11.53	19.0016	14.1985	15.6701	12.596	39.123	34.8546	This work
	6852	-31.49	-50.4	104	0.512181	11	−8.9	18.676	13	15.624	12	38.648	14	de Mahiques et al., 2008
	574	-31.0929	-49.9695	130	0.512081	4	-10.86	19.058	4	15.667	3	39.32	10	This work
	573	-30.9934	-50.1124	100	0.51206	4	-11.28	18.922	4	15.658	3	38.993	9	This work
	572	-30.7621	-50.4224	20	0.512131	4	-9.9	18.994	7	15.676	8	39.263	25	This work
	434	-30.37	-47.7976	746	0.512127	5	-9.96529	18.7785	5	15.661	4	38.8848	10	This work
	432	-30.34	-48.1847	332	0.512148	4	-9.55212	18.7807	5	15.6556	5	38.8407	15	This work
	6855	-30.31	-47.91	500	0.512127	6	-9.97	18.514	4	15.61	4	38.521	12	This work
	433	-30.28	-47.9124	490	0.512119	5	-10.1214	18.7227	4	15.6433	4	38.8141	9	This work
	6856	-30.27	-47.99	414	0.512215	12	−8.3	18.653	10	15.647	10	38.692	10	de Mahiques et al., 2008
	6857	-30.15	-48.28	240	0.512269	6	-7.2	18.566	6	15.623	4	38.595	12	This work
	6859	-30.1	-49.31	100	0.512084	6	-10.78	18.833	4	15.663	4	38.938	10	This work
	435	-30.06	-47.7156	797	0.512096	5	-10.5743	18.7144	4	15.6512	3	38.8015	7	This work
	6858	-30	-49	100	0.512163	14	−9.3							de Mahiques et al., 2008
	429	-29.86	-48.0227	348	0.512166	5	-9.21484	18.6388	4	15.6299	3	38.6621	8	This work
	428	-29.85	-48.0857	358	0.51212	5	-10.1013	18.8415	3	15.6571	3	38.9342	8	This work
	430	-29.85	-47.8328	483	0.512881	5	-14.7678	18.7051	5	15.6421	4	38.9861	11	This work
	431	-29.85	-47.6998	800	0.512119	5	-10.1321	18.8172	4	15.6529	4	38.885	8	This work
	576	-29.8318	-49.1498	98	0.511995	4	-12.55	19.044	5	15.678	4	39.204	13	This work
	6821	-29.82	-48.21	232	0.512201	10	−8.5							de Mahiques et al., 2008
	427	-29.66	-48.091	344	0.512127	5	-9.96334	18.7251	4	15.6443	4	38.854	10	This work
	426	-29.66	-47.8268	534	0.512109	5	-10.3197	18.788	5	15.6465	4	38.8935	10	This work
	423	-29.32	-48.0738	234	0.512089	5	-10.7003	18.867	8	15.6715	7	38.9133	20	This work
	422	-29.32	-47.7876	688	0.512103	5	-10.443	18.765	5	15.6376	4	38.8348	10	This work
	421	-29.31	-47.6804	888	0.512108	5	-10.3322	18.8197	5	15.6469	5	38.9219	13	This work
	575	-29.2877	-49.5742	25	0.512091	8	-10.66	18.406	8	15.636	6	38.26	15	This work
	580	-29.2864	-48.2233	156	0.512093	5	-10.63	18.705	6	15.647	5	38.893	12	This work
	6814a	-29.25	-48.7	100	0.512083	6	-10.83	18.775	4	15.638	4	38.77	10	This work
	6814	-29.25	-48.7	100	0.512155	11	−9.4	18.685	5	15.623	5	38.622	5	de Mahiques et al., 2008
	6811	-29.25	-47.85	506	0.51221	4	-8.35476	18.703	5	15.655	5	38.741	16	This work
	581	-29.2236	-48.2801	132	0.512067	4	-11.13	18.572	6	15.639	5	38.541	14	This work
	6813	-29.19	-47.96	299	0.512174	4	-9.06	18.764	4	15.627	4	38.718	10	This work
	579	-28.6314	-48.8338	30	0.512073	4	-11.02	18.638	5	15.657	5	38.517	16	This work
Santos Basin					0.512145	7.49427	-12.2343	18.7275	8.91317	15.6642	8.22035	38.9094	15.8011
	584	-28.2365	-47.8512	125	0.512036	4	-11.75	19.018	9	15.664	9	39.206	23	This work
	583	-28.1468	-48.1738	93	0.512034	5	-11.77	18.943	7	15.666	7	39.297	19	This work
	582	-28.0341	-48.5729	31	0.512073	12	-11.02	18.693	9	15.687	9	38.346	24	This work
	367	-27.4391	-48.0465	84	0.512087	5.46716	-10.7479	18.0446	7.38655	15.5575	7.15575	37.9861	21.6066	This work
	368	-27.3441	-48.3076	48	0.512068	5.58136	-11.1174	18.8963	4.65935	15.6664	4.13639	38.9954	12.1712	This work
	369	-27.2478	-48.5446	10	0.511934	5.18661	-13.7275	18.8681	4.50701	15.6683	4.3674	38.9365	11.8437	This work
	370	-27.0567	-48.1662	56	0.512051	6.01154	-11.4486	19.4086	4.61111	15.7083	4.14055	39.9492	10.06	This work
	372	-26.9316	-48.5635	20	0.511886	5.18104	-14.6595	18.9134	7.17625	15.6668	5.4536	39.0517	14.0748	This work
	263	-26.8851	-46.4159	477	0.51209	4.5404	-10.6921	18.789	6	15.668	6	38.941	17	This work
	264	-26.8559	-46.4049	458	0.51206	4.68873	-11.2833	18.749	4	15.65	3	38.887	8	This work
	262	-26.8485	-46.423	402	0.512072	4.98243	-11.0424	18.757	4	15.653	3	38.837	8	This work
	250	-26.8255	-46.4067	440	0.512078	4.90068	-10.9213	18.728	4	15.661	4	38.798	4	This work
	249	-26.8043	-46.3993	430	0.512087	4.41578	-10.752	18.736	5	15.655	4	38.807	9	This work
	259	-26.5629	-46.1168	559	0.512039	4.86232	-11.6932	18.715	3	15.654	3	38.796	7	This work
	260	-26.5618	-46.1245	517	0.512001	4.73028	-12.4323	18.741	5	15.653	5	39.012	12	This work
	258	-26.5346	-46.0804	543	0.511992	4.55215	-12.6024	18.803	4	15.654	3	38.983	9	This work
	255	-26.4946	-45.9692	652	0.512024	4.83826	-11.9733	18.72	4	15.626	4	38.778	10	This work
	256	-26.4476	-45.9689	569	0.512037	4.72593	-11.732	18.733	9	15.643	10	38.818	29	This work
	373	-26.3643	-47.8193	62	0.512057	5.10934	-11.3405	18.949	4.40495	15.7013	4.54325	39.2566	11.4999	This work
	254	-26.26	-45.7162	747	0.512016	5	-12.1397	18.809	5	15.671	5	38.994	15	This work
	253	-26.2454	-45.6828	731	0.512015	3.3992	-12.1456	18.705	5	15.641	5	38.778	13	This work
	6652	-25.85	-45.8	206	0.51215	11	−9.5	18.663	14	15.729	12	38.89	14	de Mahiques et al., 2008
	6692	-25.84	-46.95	100	0.512142	8	−9.7	18.743	18	15.692	18	39.047	15	de Mahiques et al., 2008
	6630	-25.82	-45.3	485	0.512079	9	−10.9							de Mahiques et al., 2008
	377	-25.8033	-46.9787	93	0.512042	5	-11.62	18.912	5	15.669	5	39.071	14	This work
	6653	-25.72	-46.05	145				18.665	13	15.665	17	38.858	17	de Mahiques et al., 2008
	6696	-25.57	-46.69	92				18.536	13	15.698	11	38.724	12	de Mahiques et al., 2008
	6654	-25.47	-46.59	90				18.691	15	15.689	16	38.88	17	de Mahiques et al., 2008
	6655	-25.44	-46.66	80				18.67	10	15.69	10	38.899	9	de Mahiques et al., 2008
	6700	-25.42	-46.37	100	0.51214	8	−9.7	18.538	31	15.714	19	38.775	22	de Mahiques et al., 2008
	6657	-25.28	-46.92	60				18.698	18	15.713	12	38.935	12	de Mahiques et al., 2008
	6704	-25.24	-46.05	97	0.512102	12	−10.5	18.583	11	15.768	12	38.946	12	de Mahiques et al., 2008
	6658	-25.19	-47.14	50				18.562	8	15.599	8	38.633	8	de Mahiques et al., 2008
	6664	-25.19	-44.17	472	0.511988	13	−12.7							de Mahiques et al., 2008
	378	-25.0968	-45.8303	94	0.512028	6	-11.89	18.894	7	15.663	5	39.036	13	This work
	6683	-25.06	-45.54	100	0.512087	10	−10.7	18.066	6	15.598	6	38.042	6	de Mahiques et al., 2008
	586	-25.0496	-44.5992	1009	0.511992	5	-12.6	18.898	12	15.667	11	39.162	33	This work
	587	-25.0009	-44.4895	1070	0.51952	4	-13.38	18.876	8	15.676	7	39.336	18	This work
	590	-24.9574	-44.5849	650	0.511975	4	-12.93	18.811	10	15.667	11	39.264	30	This work
	588	-24.9365	-44.4787	663	0.511967	5	-13.09	18.77	32	15.667	29	38.948	63	This work
	589	-24.9251	-44.4379	780	0.511989	5	-12.66	18.785	11	15.662	9	38.966	21	This work
	6573	-24.91	-44.62	501	0.512096	11	−10.6							de Mahiques et al., 2008
	591	-24.9081	-44.5755	547	0.51196	5	-13.23	18.866	6	15.673	5	39.212	13	This work
	593	-24.903	-44.4793	610	0.511935	4	-13.71	18.804	6	15.67	5	39.116	12	This work
	592	-24.8886	-44.4969	563	0.511969	5	-13.04	18.88	7	15.675	7	39.287	20	This work
	6678	-24.77	-45.19	100	0.512087	10	−10.9							de Mahiques et al., 2008
	379	-24.72	-45.2152	98	0.511989	8	-12.67	18.656	5	15.666	4	38.894	10	This work
	265	-24.67	-44.0815	818	0.511963	5	-13.17	18.695	10	15.664	9	38.967	23	This work
	266	-24.63	-44.0204	847	0.511953	5	-13.36	18.676	5	15.657	4	38.907	10	This work
	267	-24.55	-43.9208	805	0.511928	5	-13.86	18.673	6	15.665	7	38.952	21	This work
	6626	-24.23	-43.75	205	0.512005	13	−12.4							de Mahiques et al., 2008
	6669	-24.13	-44.71	102	0.511881	13	−14.8	18.263	11	15.618	11	38.239	11	de Mahiques et al., 2008
	6742	-23.99	-43.16	215	0.512068	11	−11.1							de Mahiques et al., 2008
	6542	-23.95	-41.61	1226	0.511899	11	−14.4							de Mahiques et al., 2008
	6743	-23.92	-42.79	508	0.511993	10	−12.6							de Mahiques et al., 2008
	6554	-23.89	-42.76	496	0.511996	10	−12.5							de Mahiques et al., 2008
	6553	-23.82	-42.79	227	0.51213	14	−9.9							de Mahiques et al., 2008
	6735	-23.75	-44.07	102	0.511976	9	−12.9							de Mahiques et al., 2008
	6752	-23.73	-42.11	502	0.512013	16	−12.2							de Mahiques et al., 2008
	6541	-23.6	-41.71	143	0.511921	14	−14.0							de Mahiques et al., 2008
	6740	-23.43	-43.43	99	0.511883	13	−14.7	18.423	14	15.605	14	38.584	21	de Mahiques et al., 2008
	6763	-23.13	-41.02	101	0.511791	11	−16.5	18.633	9	15.612	9	38.538	9	de Mahiques et al., 2008
	6539	-23.08	-41.98	98	0.511888	10	−14.6							de Mahiques et al., 2008
